# Supplementary material
Source: ML conference proceedings conference paper supplement (https://proceedings.neurips.cc/paper_files/paper/2021/hash/b4572f47b7c69e27b8e46646d9579e67-Abstract.html)
Supplement: Supplementary file 1 [file b4572f47b7c69e27b8e46646d9579e67-Supplemental.pdf]

## A Omitted Proofs: Upper Bound

This section contains omitted proofs from Section 3.

**Lemma (Lemma 1).** *Let  $\ell : \mathcal{R} \rightarrow \mathbb{R}_+^{\mathcal{Y}}$  be a discrete target loss and suppose the surrogate  $L : \mathbb{R}^d \rightarrow \mathbb{R}_+^{\mathcal{Y}}$  and link  $\psi : \mathbb{R}^d \rightarrow \mathcal{R}$  are calibrated for  $\ell$ . Then for any  $p \in \Delta_{\mathcal{Y}}$ , there exists  $\alpha_p \geq 0$  such that, for all  $u \in \mathbb{R}^d$ ,*

$$R_{\ell}(\psi(u), p) \leq \alpha_p R_L(u, p).$$

*Proof.* Fix  $p \in \Delta_{\mathcal{Y}}$ . Let  $C_p = \max_{r \in \mathcal{R}} R_{\ell}(r, p)$ . The maximum exists because  $\ell$  is discrete, i.e.  $\mathcal{R}$  is finite. Meanwhile, recall that, when defining calibration, we let  $B_{L, \psi, \ell}(p) = \{R_L(u, p) : \psi(u) \notin \gamma(p)\}$ . Let  $B_p = \inf B_{L, \psi, \ell}(p)$ . By definition of calibration, we have  $B_p > 0$ .

To combine these bounds, let  $\alpha_p = \frac{C_p}{B_p}$ . Let  $u \in \mathbb{R}^d$ . There are two cases. If  $\psi(u) \in \gamma(p)$ , then  $R_{\ell}(\psi(u), p) = 0 \leq R_L(u, p)$  immediately. If  $\psi(u) \notin \gamma(p)$ , then

$$\begin{aligned} R_{\ell}(\psi(u), p) &\leq C_p \\ &= \alpha_p \cdot B_p \\ &\leq \alpha_p R_L(u, p). \end{aligned}$$

□

**Lemma (Lemma 2).** *If  $(L, \psi)$  indirectly elicits  $\ell$ , then  $\Gamma = \text{prop}[L]$  refines  $\gamma = \text{prop}[\ell]$  in the sense that, for all  $u \in \mathbb{R}^d$ , there exists  $r \in \mathcal{R}$  such that  $\Gamma_u \subseteq \gamma_r$ .*

*Proof.* For any  $u$ , let  $r = \psi(u)$ . By indirect elicitation,  $u \in \Gamma(p) \implies r \in \gamma(p)$ . So  $\Gamma_u = \{p : u \in \Gamma(p)\} \subseteq \{p : r \in \gamma(p)\} = \gamma_r$ . □

**Lemma (Lemma 3).** *Suppose  $(L, \psi)$  indirectly elicits  $\ell$  and let  $\Gamma = \text{prop}[L]$ . Then for any fixed  $u, u^* \in \mathbb{R}^d$  and  $r \in \mathcal{R}$ , the functions  $R_L(u, \cdot)$  and  $R_{\ell}(r, \cdot)$  are linear in their second arguments on  $\Gamma_{u^*}$ .*

*Proof.* Let  $u^* \in \mathbb{R}^d$  and  $p \in \Gamma_{u^*}$ . By definition, for all  $p \in \Gamma_{u^*}$ ,  $\underline{L}(p) = \langle p, L(u^*) \rangle$ . So for fixed  $u$ ,

$$R_L(u, p) = \langle p, L(u) \rangle - \langle p, L(u^*) \rangle = \langle p, L(u) - L(u^*) \rangle,$$

a linear function of  $p$  on  $\Gamma_{u^*}$ . Next, by Lemma 2, there exists  $r^*$  such that  $\Gamma_{u^*} \subseteq \gamma_{r^*}$ . By the same argument, for fixed  $r$ ,  $R_{\ell}(r, p) = \langle p, \ell(r) - \ell(r^*) \rangle$ , a linear function of  $p$  on  $\gamma_{r^*}$  and thus on  $\Gamma_{u^*}$ . □

**Lemma (Lemma 4).** *If  $L : \mathbb{R}^d \rightarrow \mathbb{R}_+^{\mathcal{Y}}$  is polyhedral, then  $\Gamma = \text{prop}[L]$  has a finite set of level sets that union to  $\Delta_{\mathcal{Y}}$ . Moreover, these level sets are polytopes.*

*Proof.* This statement can be deduced from the embedding framework of [10]. In particular, Lemma 5 of [10] states that if  $L$  is polyhedral, then its Bayes risk  $\underline{L}$  is concave polyhedral, i.e. is the pointwise minimum of a finite set of affine functions. It follows that there exists a finite set  $U \subset \mathbb{R}^d$  such that

$$\underline{L}(p) = \min_{u \in \mathbb{R}^d} \langle p, L(u) \rangle = \min_{u \in U} \langle p, L(u) \rangle. \quad (4)$$

We claim the level sets of  $U$  witness the claim. First, it is known (e.g. from theory of power diagrams, [2]) that if  $\underline{L}$  is a polyhedral function represented as (4) and  $u \in U$ , then  $\Gamma_u = \{p \in \Delta_{\mathcal{Y}} : \langle p, L(u) \rangle = \underline{L}(p)\}$  is a polytope. Finally, suppose for contradiction that there exists  $p \in \Delta_{\mathcal{Y}}$ ,  $p \notin \cup_{u \in U} \Gamma_u$ . Then there must be some  $u' \notin U$  with  $p \in \Gamma_{u'}$ , implying that  $\langle p, L(u') \rangle > \max_{u \in U} \langle p, L(u) \rangle$ , contradicting (4). □

**Theorem (Theorem 3).** *Suppose the surrogate loss  $L : \mathbb{R}^d \rightarrow \mathbb{R}_+^{\mathcal{Y}}$  and link  $\psi : \mathbb{R}^d \rightarrow \mathcal{R}$  are consistent for the target loss  $\ell : \mathcal{R} \rightarrow \mathbb{R}_+^{\mathcal{Y}}$ . If  $L$  is polyhedral, then  $(L, \psi)$  guarantee a linear regret transfer for  $\ell$ , i.e. there exists  $\alpha \geq 0$  such that, for all  $\mathcal{D}$  and all measurable  $h : \mathcal{X} \rightarrow \mathbb{R}^d$ ,*

$$R_{\ell}(\psi \circ h; \mathcal{D}) \leq \alpha R_L(h; \mathcal{D}).$$

*Proof.* We first recall that by Fact 1, consistency implies that  $(L, \psi)$  are calibrated for  $\ell$  and that  $(L, \psi)$  indirectly elicit  $\ell$ . Next, by Observation 1, it suffices to show a linear *conditional* regret transfer, i.e. for all  $p \in \Delta_{\mathcal{Y}}$  and  $u \in \mathbb{R}^d$ , we show  $R_\ell(\psi(u), p) \leq \alpha R_L(u, p)$ .

By Lemma 4, the polyhedral loss  $L$  has a finite set  $U \subset \mathbb{R}^d$  of predictions such that (a) for each  $u \in U$ , the level set  $\Gamma_u$  is a polytope, and (b)  $\cup_{u \in U} \Gamma_u = \Delta_{\mathcal{Y}}$ . Let  $\mathcal{Q}_u \subset \Delta_{\mathcal{Y}}$  be the finite set of vertices of the polytope  $\Gamma_u$ , and define the finite set  $\mathcal{Q} = \cup_{u \in U} \mathcal{Q}_u$ .

By Lemma 1, for each  $q \in \mathcal{Q}$ , there exists  $\alpha_q \geq 0$  such that  $R_\ell(\psi(u), q) \leq \alpha_q R_L(u, q)$  for all  $u$ . We choose

$$\alpha = \max_{q \in \mathcal{Q}} \alpha_q.$$

To prove the conditional regret transfer, consider any  $p \in \Delta_{\mathcal{Y}}$  and any  $u \in \mathbb{R}^d$ . There exists  $u \in U$  such that  $p \in \Gamma_u$ , a polytope. So we can write  $p$  as a convex combination of its vertices, i.e.

$$p = \sum_{q \in \mathcal{Q}_u} \beta(q)q$$

for some probability distribution  $\beta$ . Recall that  $\mathcal{Q}_u \subseteq \Gamma_u$  and  $R_L$  and  $R_\ell$  are linear in  $p$  on  $\Gamma_u$  by Lemma 3. So, for any  $u'$ :

$$\begin{aligned} R_\ell(\psi(u'), p) &= R_\ell \left( \psi(u'), \sum_{q \in \mathcal{Q}_u} \beta(q)q \right) \\ &= \sum_{q \in \mathcal{Q}_u} \beta(q) R_\ell(\psi(u'), q) \\ &\leq \sum_{q \in \mathcal{Q}_u} \beta(q) \alpha_q R_L(u', q) \\ &\leq \alpha \sum_{q \in \mathcal{Q}_u} \beta(q) R_L(u', q) \\ &= \alpha R_L(u', p). \end{aligned}$$

□

## B Omitted Proofs: Lower Bound

This section contains omitted proofs from Section 4.

**Theorem** (Theorem 4). *Suppose the surrogate loss  $L$  and link  $\psi$  satisfy a regret transfer of  $\zeta$  for a target loss  $\ell$ . If  $L$ ,  $\psi$ , and  $\ell$  satisfy Assumption 1, then there exists  $c > 0$  such that, for some  $\epsilon^* > 0$ , for all  $0 \leq \epsilon < \epsilon^*$ ,  $\zeta(\epsilon) \geq c\sqrt{\epsilon}$ .*

*Proof outline:* By assumption we have a boundary report  $u_0$  which is  $L$ -optimal for a distribution  $p_0$ . We have some  $r, r'$  which are both optimal for  $p_0$ , and  $\psi(u_0) = r'$ . First, we will choose a  $p_1$  where  $r$  is uniquely optimal, hence  $u_0$  is a strictly suboptimal choice. We then consider a sequence of distributions  $p_\lambda = (1 - \lambda)p_0 + \lambda p_1$ , approaching  $p_0$  as  $\lambda \rightarrow 0$ . For all such  $p_\lambda$ , it will happen that  $r$  is optimal while  $u_0$  and  $r' = \psi(u_0)$  are strictly suboptimal. We show that  $R_\ell(r', p_\lambda) = c_\ell \lambda$  for some constant  $c_\ell$  and all small enough  $\lambda$ . Meanwhile, we will show that  $R_L(u_0, p_\lambda) \leq O(\lambda^2)$ , proving the result. The last fact will use the properties of strong smoothness and strong convexity in a neighborhood of  $u_0$ .

*Proof.* Obtain  $\alpha, u_0, p_0, r, r'$ , and an open neighborhood of  $u_0$  from Assumption 1 and the definition of boundary report. Assume without loss of generality that  $\psi(u_0) = r'$ ; otherwise, swap the roles of  $r$  and  $r'$ .

**Linearity of  $R_\ell(r', p_\lambda)$ .** As  $\ell$  is non-redundant by assumption, there exists some  $p_1 \in \overset{\circ}{\gamma}_r$ , the relative interior of the full-dimensional level set  $\gamma_r$ . We therefore have  $R_\ell(r', p_1) = \langle p_1, \ell(r') - \ell(r) \rangle =: c_\ell > 0$ , and  $R_\ell(r', p_0) = 0$ . Let  $p_\lambda := (1 - \lambda)p_0 + \lambda p_1$ . By convexity of  $\gamma_r$ , we have  $p_\lambda \in \gamma_r$  for all  $\lambda \in [0, 1]$ , which gives  $R_\ell(r', p_\lambda) = \lambda c_\ell$ .

**Obtaining the global minimizer  $u_\lambda$  of  $L_\lambda$ .** Let  $L_\lambda : \mathbb{R}^d \rightarrow \mathbb{R}_+$  be given by  $L_\lambda(u) = \langle p_\lambda, L(u) \rangle = (1 - \lambda)\langle p_0, L(u) \rangle + \lambda\langle p_1, L(u) \rangle$ . Let  $\delta > 0$  such that the above open neighborhood of  $u_0$  contains the Euclidean ball  $B_\delta(u_0)$  of radius  $\delta$  around  $u_0$ . Let  $u_1 \in \Gamma(p_1)$ . We argue that for all small enough  $\lambda$ ,  $L_\lambda(u)$  is uniquely minimized by some  $u_\lambda \in B_\delta(u_0)$ . For any  $u \notin B_\delta(u_0)$ , we have, using local strong convexity and the optimality of  $u_1$ ,

$$\begin{aligned} L_\lambda(u) - L_\lambda(u_0) &= (1 - \lambda)(L_0(u) - L_0(u_0)) + \lambda(L_1(u) - L_1(u_0)) \\ &\geq (1 - \lambda)\left(\frac{\alpha}{2}\delta^2\right) + \lambda(L_1(u_1) - L_1(u_0)) \\ &> 0 \end{aligned}$$

if  $\lambda < \lambda^* := \alpha\delta^2 / (2\alpha\delta^2 + 4L_1(u_0) - 4L_1(u_1))$ . For the remainder of the proof, let  $\lambda < \lambda^*$ . Then any  $u \notin B_\delta(u_0)$  has  $L_\lambda(u) > L_\lambda(u_0)$ , hence is suboptimal. By  $\alpha$ -strong convexity of  $L_0$  on  $B_\delta(u_0)$ ,  $L_\lambda$  is strictly convex on  $B_\delta(u_0)$ . So it has a unique minimizer  $u_\lambda$ , and by the above argument this is the global minimizer of  $L_\lambda$ . Then  $\underline{L}(p_\lambda) = L_\lambda(u_\lambda)$ , and thus  $R_L(u_0, p_\lambda) = L_\lambda(u_0) - L_\lambda(u_\lambda)$ . We also observe here that  $R_L(u_0, p_\lambda)$  is continuous in  $\lambda$ , e.g. because the Bayes risk of  $L$  is continuous in  $p$  as is  $\langle p, L(u_0) \rangle$ . It is also zero when  $\lambda = 0$ .

**Showing  $R_L$  is quadratic in  $\lambda$ .** By assumption, the gradient of  $L_y$  is locally Lipschitz for all  $y \in \mathcal{Y}$ . We will apply this fact to the compact set  $\mathcal{C} = \{u \in \mathbb{R}^d : \|u - u_1\| \leq \|u_0 - u_1\| + \delta\}$ . By compactness, we have a finite subcover of open neighborhoods; let  $\beta$  be the minimum Lipschitz constant over this finite set of neighborhoods. We thus have that  $L_y$  is  $\beta$ -strongly smooth on  $\mathcal{C}$ , and hence so is  $L_\lambda$  for any  $\lambda \in [0, 1]$ .

We now upper bound  $\|u_\lambda - u_0\|_2$ , and then apply strong smoothness to upper bound  $R_L(u_0, p_\lambda) = L_\lambda(u_0) - L_\lambda(u_\lambda)$ . Consider the first-order optimality condition of  $L_\lambda$ :

$$\begin{aligned} 0 &= \nabla L_\lambda(u_\lambda) = (1 - \lambda)\nabla L_0(u_\lambda) + \lambda\nabla L_1(u_\lambda) \\ \implies (1 - \lambda)\|\nabla L_0(u_\lambda)\|_2 &= \lambda\|\nabla L_1(u_\lambda)\|_2. \end{aligned}$$

By optimality of  $u_0$  and  $u_1$ , strong convexity of  $L_0$  and strong smoothness of  $L_1$ , and the triangle inequality, we have

$$\begin{aligned} \|\nabla L_0(u_\lambda)\|_2 &= \|\nabla L_0(u_\lambda) - \nabla L_0(u_0)\|_2 \geq \alpha\|u_\lambda - u_0\|_2, \\ \|\nabla L_1(u_\lambda)\|_2 &= \|\nabla L_1(u_\lambda) - \nabla L_1(u_1)\|_2 \leq \beta\|u_\lambda - u_1\|_2 \\ &\leq \beta(\|u_\lambda - u_0\|_2 + \|u_0 - u_1\|_2). \end{aligned}$$

Combining,

$$\begin{aligned} (1 - \lambda)\alpha\|u_\lambda - u_0\|_2 &\leq (1 - \lambda)\|\nabla L_0(u_\lambda)\|_2 \\ &= \lambda\|\nabla L_1(u_\lambda)\|_2 \\ &\leq \lambda\beta(\|u_\lambda - u_0\|_2 + \|u_0 - u_1\|_2). \end{aligned}$$

Now rearranging and taking  $\lambda \leq \frac{1}{2} \frac{\alpha}{\alpha + \beta}$ , we have

$$\|u_\lambda - u_0\|_2 \leq \frac{\lambda\beta}{(1 - \lambda)\alpha - \lambda\beta} \|u_0 - u_1\|_2 \leq \lambda \frac{2\beta}{\alpha} \|u_0 - u_1\|_2.$$

Finally, from strong smoothness of  $L_\lambda$  and optimality of  $u_\lambda$ ,

$$L_\lambda(u_0) - L_\lambda(u_\lambda) \leq \frac{\beta}{2} \|u_0 - u_\lambda\|_2^2 \leq \frac{\beta}{2} \left( \lambda \frac{2\beta}{\alpha} \|u_0 - u_1\|_2 \right)^2 = c_L \lambda^2,$$

where  $c_L = \frac{2\beta^3}{\alpha^2} \|u_0 - u_1\|_2^2 > 0$ .

To conclude: we have found a  $\lambda^* > 0$  and shown that for all  $0 \leq \lambda < \lambda^*$ ,  $R_\ell(r', p_\lambda) = c_\ell \lambda$  and  $R_L(u_0, p_\lambda) \leq c_L \lambda^2$ . In particular, let  $\epsilon^* = \sup_{0 \leq \lambda < \lambda^*} R_L(u_0, p_\lambda)$ . Then for all  $0 \leq \epsilon < \epsilon^*$ , by continuity, we can choose  $\lambda < \lambda^*$  such that  $R_L(u_0, p_\lambda) = \epsilon \leq c_L \lambda^2$ . Meanwhile,  $R_\ell(\psi(u_0), p_\lambda) = c_\ell \lambda \geq \frac{c_\ell}{\sqrt{c_L}} \sqrt{\epsilon}$ . Recalling that  $\zeta(R_L(u_0, p_\lambda)) \geq R_\ell(\psi(u_0), p_\lambda)$  by definition, this implies  $\zeta(\epsilon) \geq c\sqrt{\epsilon}$  for all  $\epsilon < \epsilon^*$ , with  $c = \frac{c_\ell}{\sqrt{c_L}}$ .  $\square$

## C Omitted Proofs: Constant Derivation

This section contains omitted proofs from Section 5.

### C.1 Hoffman constants

First we appeal to a known fact, the existence of Hoffman constants for systems of linear inequalities. See Zalinescu [35] for a modern treatment.

**Theorem 7** (Hoffman constant [14]). *Given a matrix  $A \in \mathbb{R}^{m \times n}$ , there exists some smallest  $H(A) \geq 0$ , called the Hoffman constant (with respect to  $\|\cdot\|_\infty$ ), such that for all  $b \in \mathbb{R}^m$  and all  $x \in \mathbb{R}^n$ ,*

$$d_\infty(x, S(A, b)) \leq H(A) \|(Ax - b)_+\|_\infty, \quad (5)$$

where  $S(A, b) = \{x \in \mathbb{R}^n \mid Ax \leq b\}$  and  $(u)_+ \doteq \max(u, 0)$  component-wise.

**Lemma** (Lemma 5). *Let  $L : \mathbb{R}^d \rightarrow \mathbb{R}_+^{\mathcal{Y}}$  be a polyhedral loss with  $\Gamma = \text{prop}[L]$ . Then for any fixed  $p$ , there exists some smallest constant  $H_{L,p} \geq 0$  such that  $d_\infty(u, \Gamma(p)) \leq H_{L,p} R_L(u, p)$  for all  $u \in \mathbb{R}^d$ .*

*Proof.* Since  $L$  is polyhedral, there exist  $a_1, \dots, a_m \in \mathbb{R}^d$  and  $c \in \mathbb{R}^m$  such that we may write  $\langle p, L(u) \rangle = \max_{1 \leq j \leq m} a_j \cdot u + c_j$ . Let  $A \in \mathbb{R}^{m \times d}$  be the matrix with rows  $a_j$ , and let  $b = \underline{L}(p)\mathbf{1} - c$ , where  $\mathbf{1} \in \mathbb{R}^m$  is the all-ones vector. Then we have

$$\begin{aligned} S(A, b) &\doteq \{u \in \mathbb{R}^d \mid Au \leq b\} \\ &= \{u \in \mathbb{R}^d \mid Au + c \leq \underline{L}(p)\mathbf{1}\} \\ &= \{u \in \mathbb{R}^d \mid \forall i (Au + c)_i \leq \underline{L}(p)\} \\ &= \{u \in \mathbb{R}^d \mid \max_i (Au + c)_i \leq \underline{L}(p)\} \\ &= \{u \in \mathbb{R}^d \mid \langle p, L(u) \rangle \leq \underline{L}(p)\} \\ &= \Gamma(p). \end{aligned}$$

Similarly, we have  $\max_i (Au - b)_i = \langle p, L(u) \rangle - \underline{L}(p) = R_L(u, p) \geq 0$ . Thus,

$$\begin{aligned} \|(Au - b)_+\|_\infty &= \max_i ((Au - b)_+)_i \\ &= \max((Au - b)_1, \dots, (Au - b)_m, 0) \\ &= \max(\max_i (Au - b)_i, 0) \\ &= \max_i (Au - b)_i \\ &= R_L(u, p). \end{aligned}$$

Now applying Theorem 7, we have

$$\begin{aligned} d_\infty(u, \Gamma(p)) &= d_\infty(u, S(A, b)) \\ &\leq H(A) \|(Au - b)_+\|_\infty \\ &= H(A) R_L(u, p). \end{aligned}$$

□

### C.2 Separated links

**Lemma** (Lemma 6). *Let polyhedral surrogate  $L : \mathbb{R}^d \rightarrow \mathbb{R}_+^{\mathcal{Y}}$ , discrete loss  $\ell : \mathcal{R} \rightarrow \mathbb{R}_+^{\mathcal{Y}}$ , and link  $\psi : \mathbb{R}^d \rightarrow \mathcal{R}$  be given such that  $(L, \psi)$  is calibrated with respect to  $\ell$ . Then there exists  $\epsilon > 0$  such that  $\psi$  is  $\epsilon$ -separated with respect to  $\Gamma \doteq \text{prop}[L]$  and  $\gamma \doteq \text{prop}[\ell]$ .*

*Proof.* Suppose that  $\psi$  is not  $\epsilon$ -separated for any  $\epsilon > 0$ . Then letting  $\epsilon_i \doteq 1/i$  we have sequences  $\{p_i\}_i \subset \Delta_{\mathcal{Y}}$  and  $\{u_i\}_i \subset \mathbb{R}^d$  such that for all  $i \in \mathbb{N}$  we have both  $\psi(u_i) \notin \gamma(p_i)$  and  $d_\infty(u_i, \Gamma(p_i)) \leq \epsilon_i$ . First, observe that there are only finitely many values for  $\gamma(p_i)$  and  $\Gamma(p_i)$ ,

as  $\mathcal{R}$  is finite and  $L$  is polyhedral. Thus, there must be some  $p \in \Delta_{\mathcal{Y}}$  and some infinite subsequence indexed by  $j \in J \subseteq \mathbb{N}$  where for all  $j \in J$ , we have  $\psi(u_j) \notin \gamma(p)$  and  $\Gamma(p_j) = \Gamma(p)$ .

Next, observe that, as  $L$  is polyhedral, the expected loss  $\langle p, L(u) \rangle$  is  $\beta$ -Lipschitz in  $\|\cdot\|_{\infty}$  for some  $\beta > 0$ . Thus, for all  $j \in J$ , we have

$$\begin{aligned} d_{\infty}(u_j, \Gamma(p)) \leq \epsilon_j &\implies \exists u^* \in \Gamma(p) \|u_j - u^*\|_{\infty} \leq \epsilon_j \\ &\implies |\langle p, L(u_j) \rangle - \langle p, L(u^*) \rangle| \leq \beta \epsilon_j \\ &\implies |\langle p, L(u_j) \rangle - \underline{L}(p)| \leq \beta \epsilon_j. \end{aligned}$$

Finally, for this  $p$ , we have

$$\inf_{u: \psi(u) \notin \gamma(p)} \langle p, L(u) \rangle \leq \inf_{j \in J} \langle p, L(u_j) \rangle = \underline{L}(p),$$

contradicting the calibration of  $\psi$ .  $\square$

### C.3 Combining the loss and link

**Lemma 7.** *Let  $\ell : \mathcal{R} \rightarrow \mathbb{R}_+^{\mathcal{Y}}$  be a discrete target loss,  $L : \mathbb{R}^d \rightarrow \mathbb{R}_+^{\mathcal{Y}}$  be a polyhedral surrogate loss, and  $\psi : \mathbb{R}^d \rightarrow \mathcal{R}$  a link function. If  $(L, \psi)$  indirectly elicit  $\ell$  and  $\psi$  is  $\epsilon$ -separated, then for all  $u$  and  $p$ ,*

$$R_{\ell}(\psi(u), p) \leq \frac{C_{\ell} H_{L,p}}{\epsilon} R_L(u, p).$$

*Proof.* If  $\psi(u) \in \gamma(p)$ , then  $R_{\ell}(u, p) = 0$  and we are done. Otherwise, applying the definition of  $\epsilon$ -separated and Lemma 5,

$$\begin{aligned} \epsilon &< d_{\infty}(u, \Gamma(p)) \\ &\leq H_{L,p} R_L(u, p). \end{aligned}$$

So  $R_{\ell}(\psi(u), p) \leq C_{\ell} \leq \frac{C_{\ell} H_{L,p}}{\epsilon} R_L(u, p)$ .  $\square$

**Theorem** (Constructive linear transfer, Theorem 5). *Let  $\ell : \mathcal{R} \rightarrow \mathbb{R}_+^{\mathcal{Y}}$  be a discrete target loss,  $L : \mathbb{R}^d \rightarrow \mathbb{R}_+^{\mathcal{Y}}$  be a polyhedral surrogate loss, and  $\psi : \mathbb{R}^d \rightarrow \mathcal{R}$  a link function. If  $(L, \psi)$  are consistent for  $\ell$ , then*

$$(\forall h, \mathcal{D}) \quad R_{\ell}(\psi \circ h; \mathcal{D}) \leq \frac{C_{\ell} H_L}{\epsilon_{\psi}} R_L(h; \mathcal{D}).$$

The proof closely mirrors the proof of the nonconstructive upper bound, Theorem 1.

*Proof.* By Lemma 6,  $\psi$  is separated and  $\epsilon_{\psi}$  well-defined. By Lemma 7, for each  $p \in \mathcal{Q}$ ,  $R_{\ell}(\psi(u), p) \leq \frac{C_{\ell} H_L}{\epsilon_{\psi}} R_L(u, p)$  for all  $u$ . Now consider a general  $p$ , which is in some full-dimensional polytope level set  $\Gamma_u$ . Write  $p = \sum_{q \in \mathcal{Q}_u} \beta(q) q$  for some probability distribution  $\beta$ , where  $\mathcal{Q}_u$  is the set of vertices of  $\Gamma_u$ . By Lemma 3,  $R_L$  and  $R_{\ell}$  are linear in  $p$  on  $\Gamma_u$ , so for any  $u'$ ,

$$\begin{aligned} R_{\ell}(\psi(u'), p) &= \sum_{q \in \mathcal{Q}_u} \beta(q) R_{\ell}(\psi(u'), q) \\ &\leq \sum_{q \in \mathcal{Q}_u} \beta(q) \frac{C_{\ell} H_L}{\epsilon_{\psi}} R_L(u', q) \\ &\leq \frac{C_{\ell} H_L}{\epsilon_{\psi}} \sum_{q \in \mathcal{Q}_u} \beta(q) R_L(u', q) \\ &\leq \frac{C_{\ell} H_L}{\epsilon_{\psi}} R_L(u', p). \end{aligned}$$

By Observation 1, this conditional regret transfer implies a full regret transfer, with the same constant.  $\square$
